# Supplementary material for: G-protein-coupled receptors regulate autophagy by ZBTB16-mediated ubiquitination and proteasomal degradation of Atg14L
Source: eLife journal article supplement (doi:10.7554/elife.06734), 2015-03-30
Supplement: supp [file elife-06734-supp-v1.zip]

Archive with 7 entries (7 files):
- elife_poa_e06734_Figure_2_figure_supplement_1.pdf
- elife_poa_e06734_Figure_3_figure_supplement_2.pdf
- elife_poa_e06734_Figure_3_figure_supplement_1.pdf
- elife_poa_e06734_Figure_5_figure_supplement_2.pdf
- elife_poa_e06734_Figure_1_figure_supplement_1.pdf
- elife_poa_e06734_Figure_6_figure_supplement_1.pdf
- elife_poa_e06734_Figure_5_figure_supplement_1.pdf
