# Supplementary figures and images for: G-protein-coupled receptors regulate autophagy by ZBTB16-mediated ubiquitination and proteasomal degradation of Atg14L
Source: eLife journal article supplement (doi:10.7554/elife.06734), 2015-03-30

**Figure 2- figure supplement 1.**

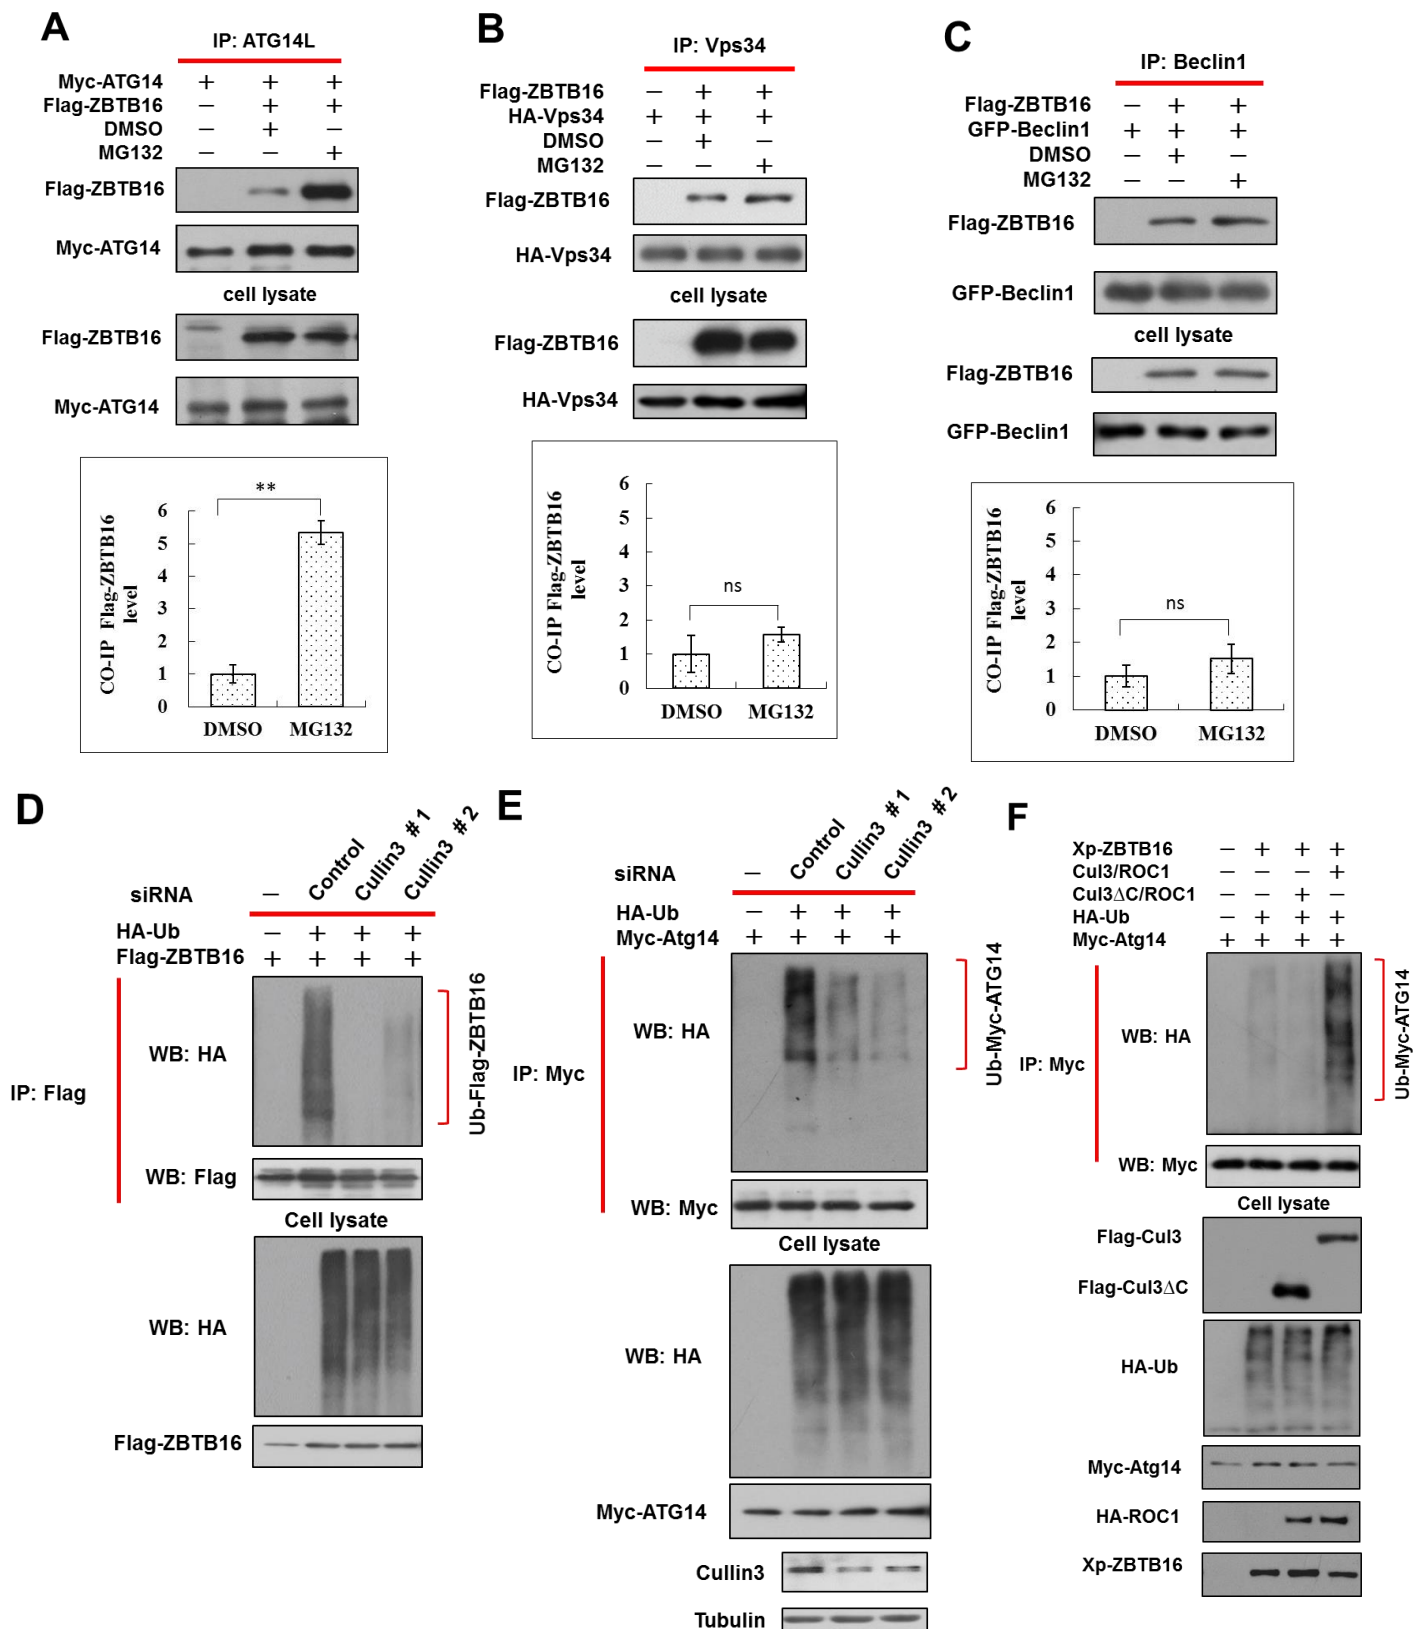

Supplement: supp [file elife-06734-supp-v1.zip]

Figure 3- figure supplement 1.

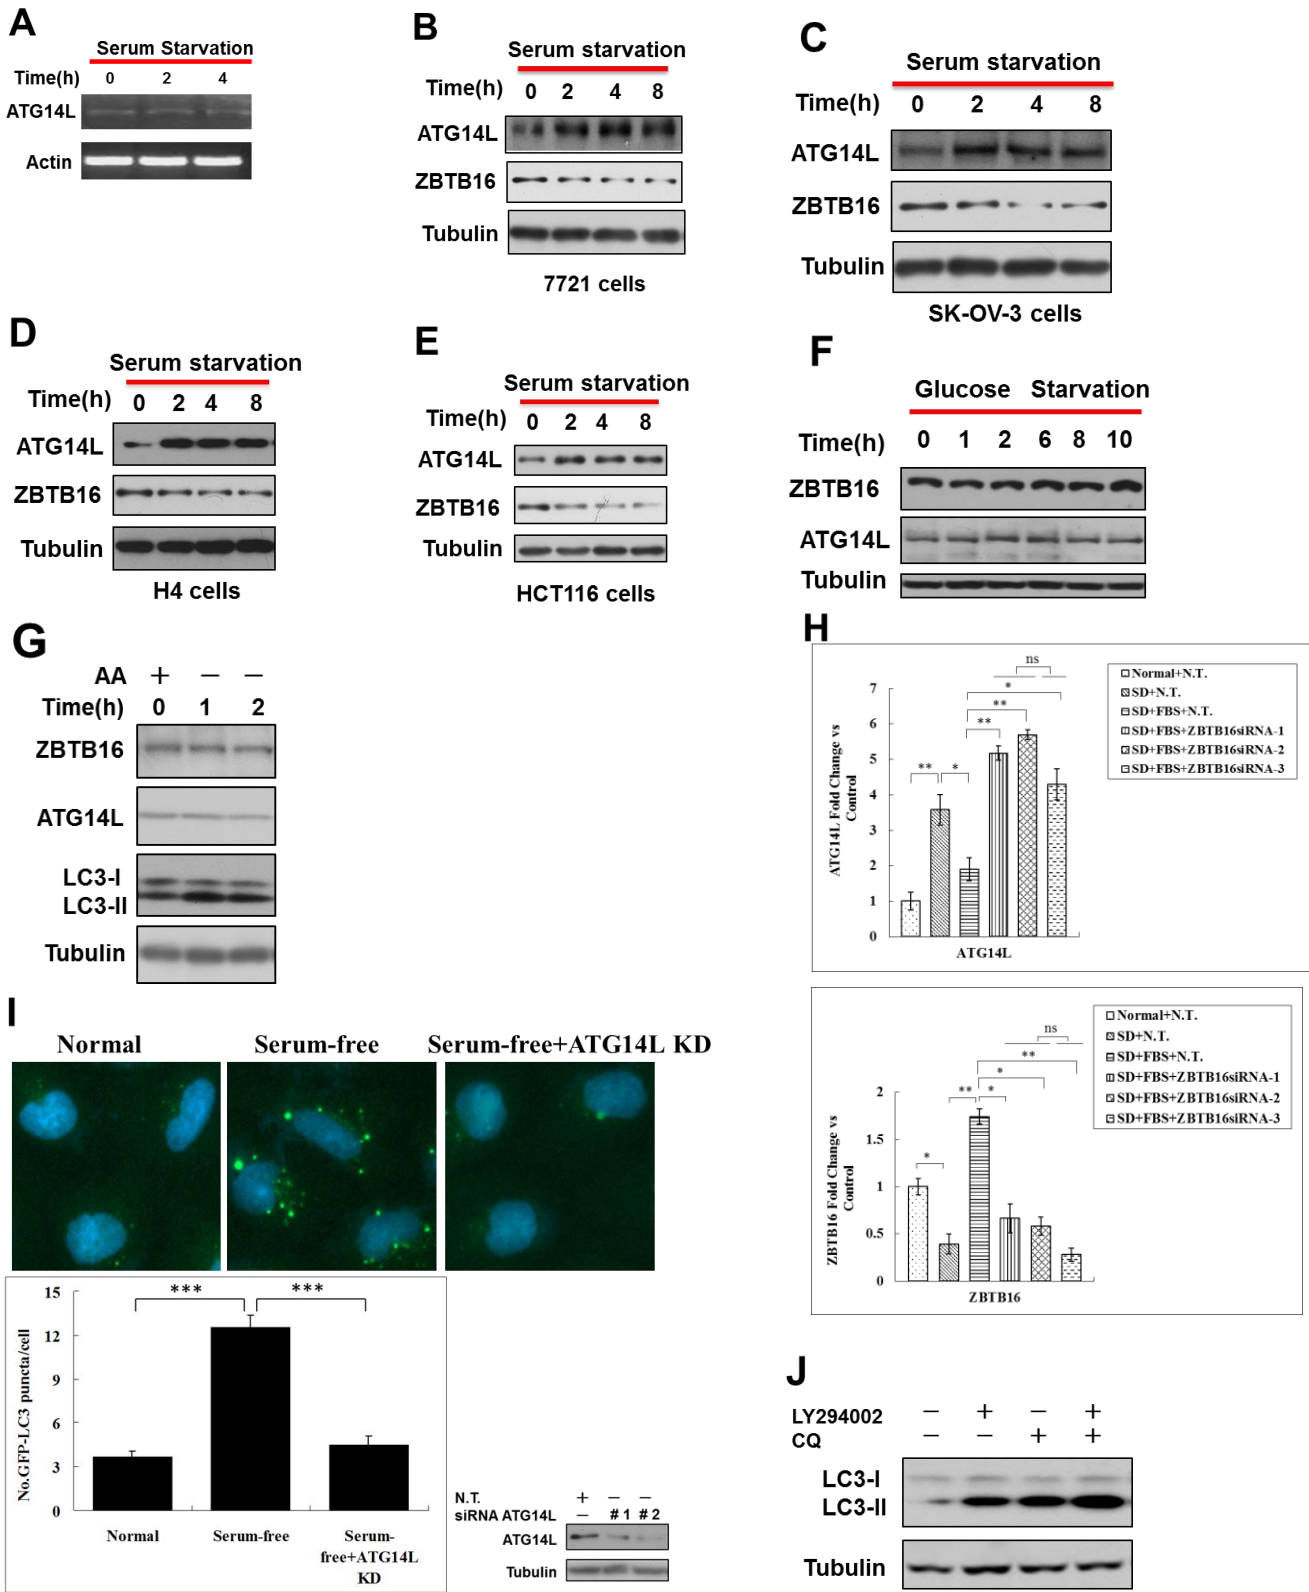

Supplement: supp [file elife-06734-supp-v1.zip]

**Figure 5- figure supplement 1.**

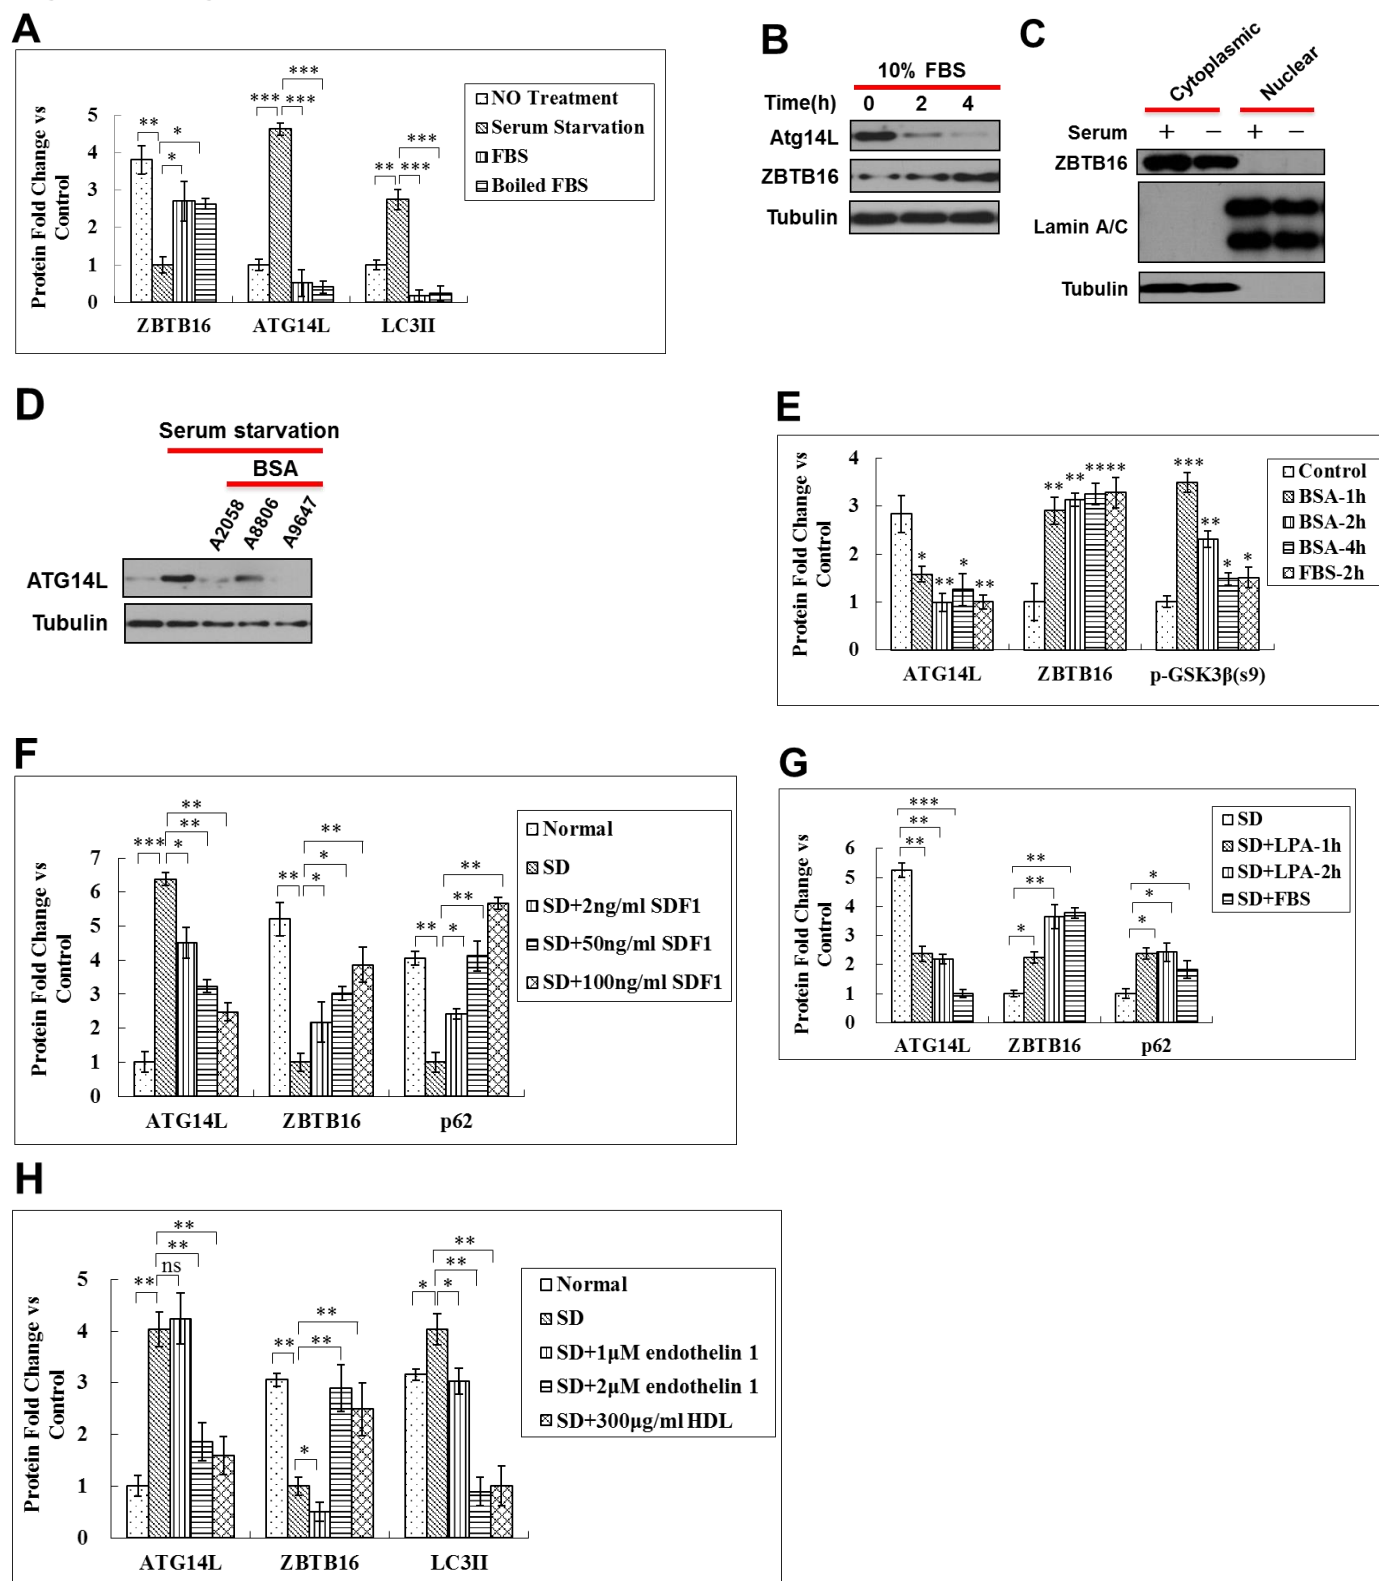

Supplement: supp [file elife-06734-supp-v1.zip]

Figure 5- figure supplement 2.

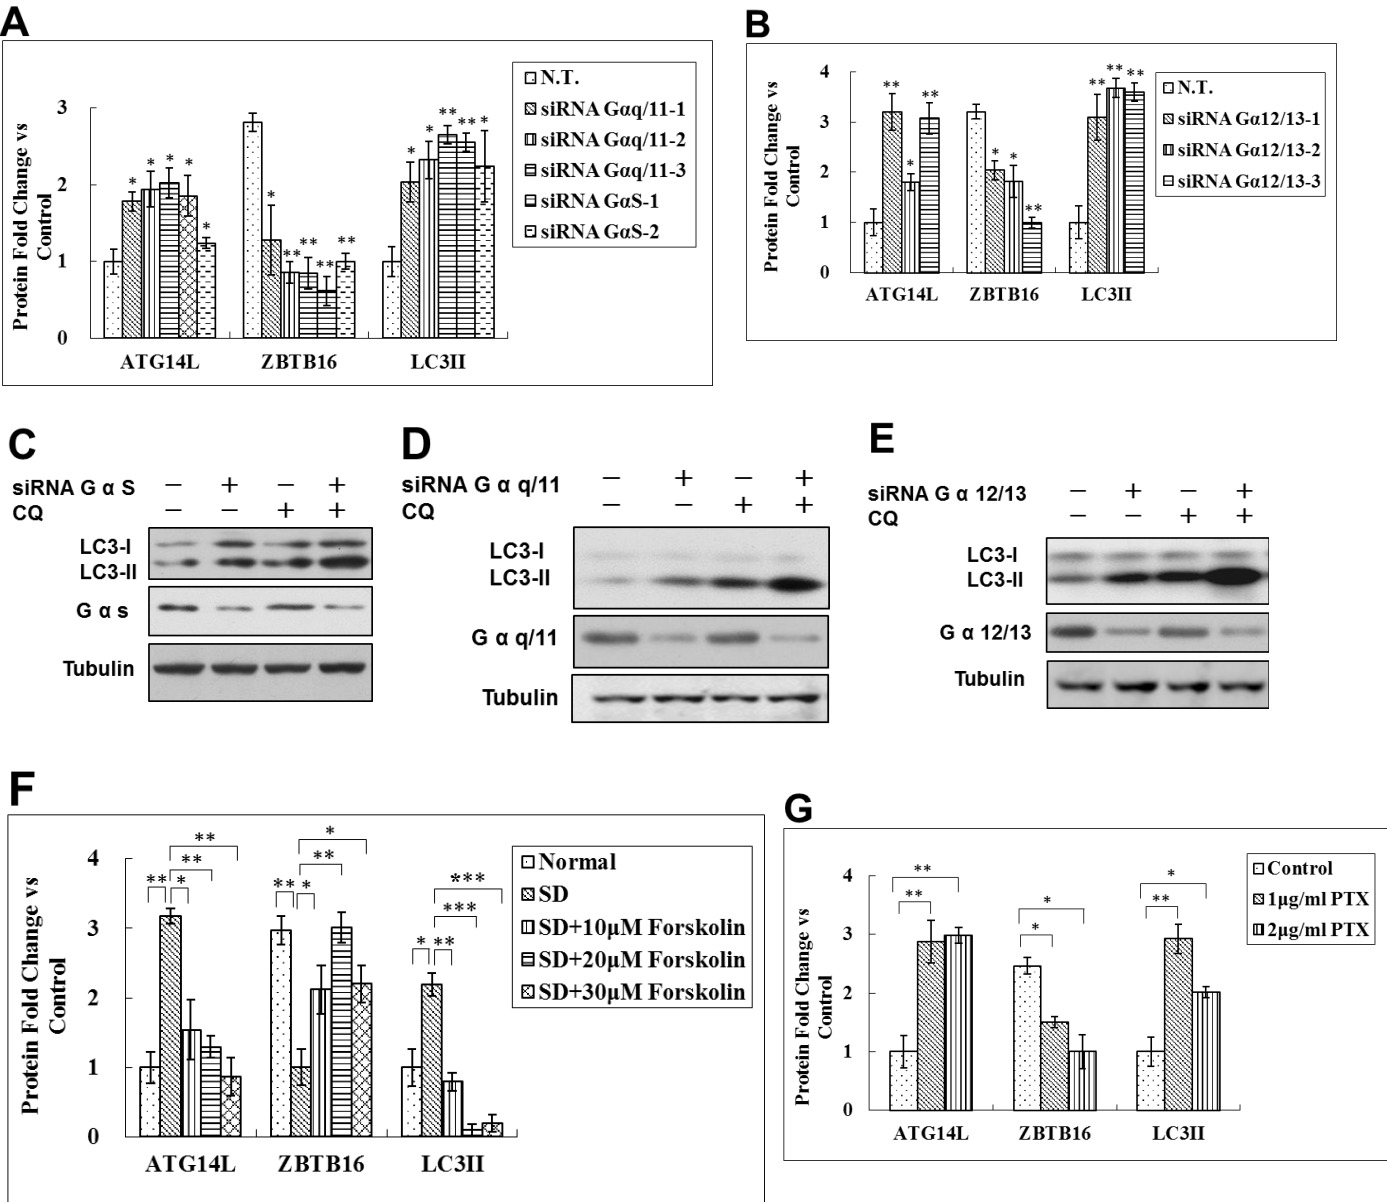

Supplement: supp [file elife-06734-supp-v1.zip]

Figure 1- figure supplement 1.

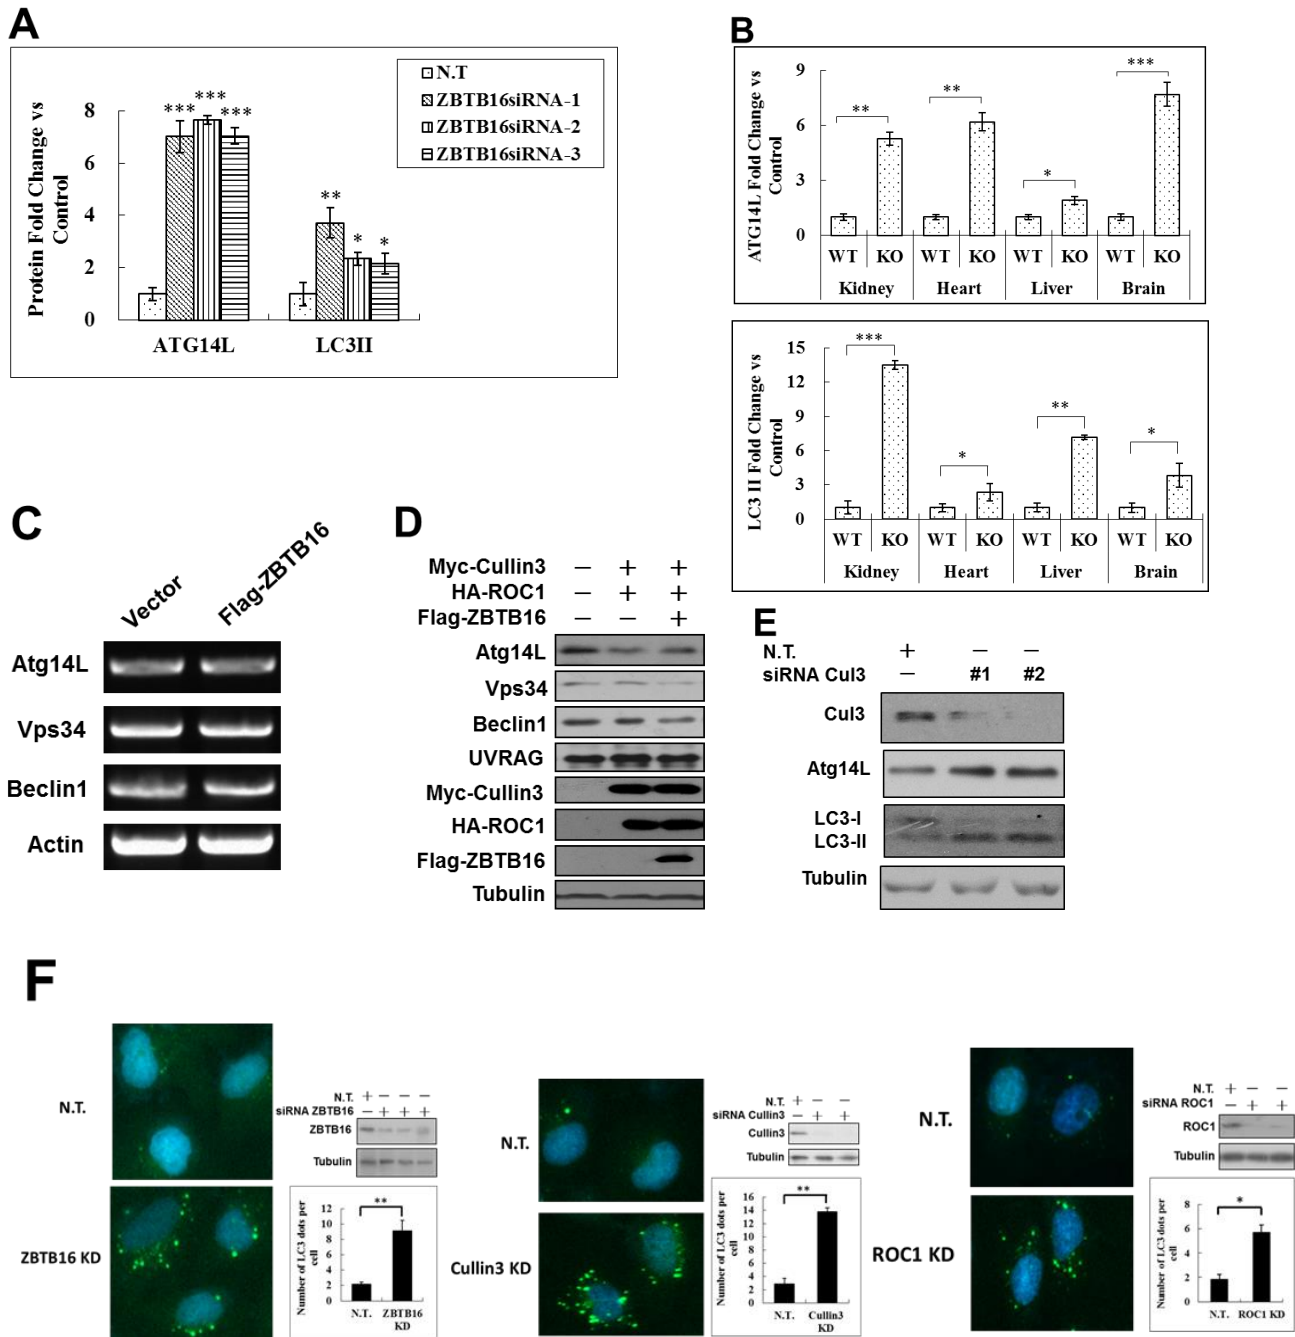

Supplement: supp [file elife-06734-supp-v1.zip]

**Figure 3- figure supplement 2.**

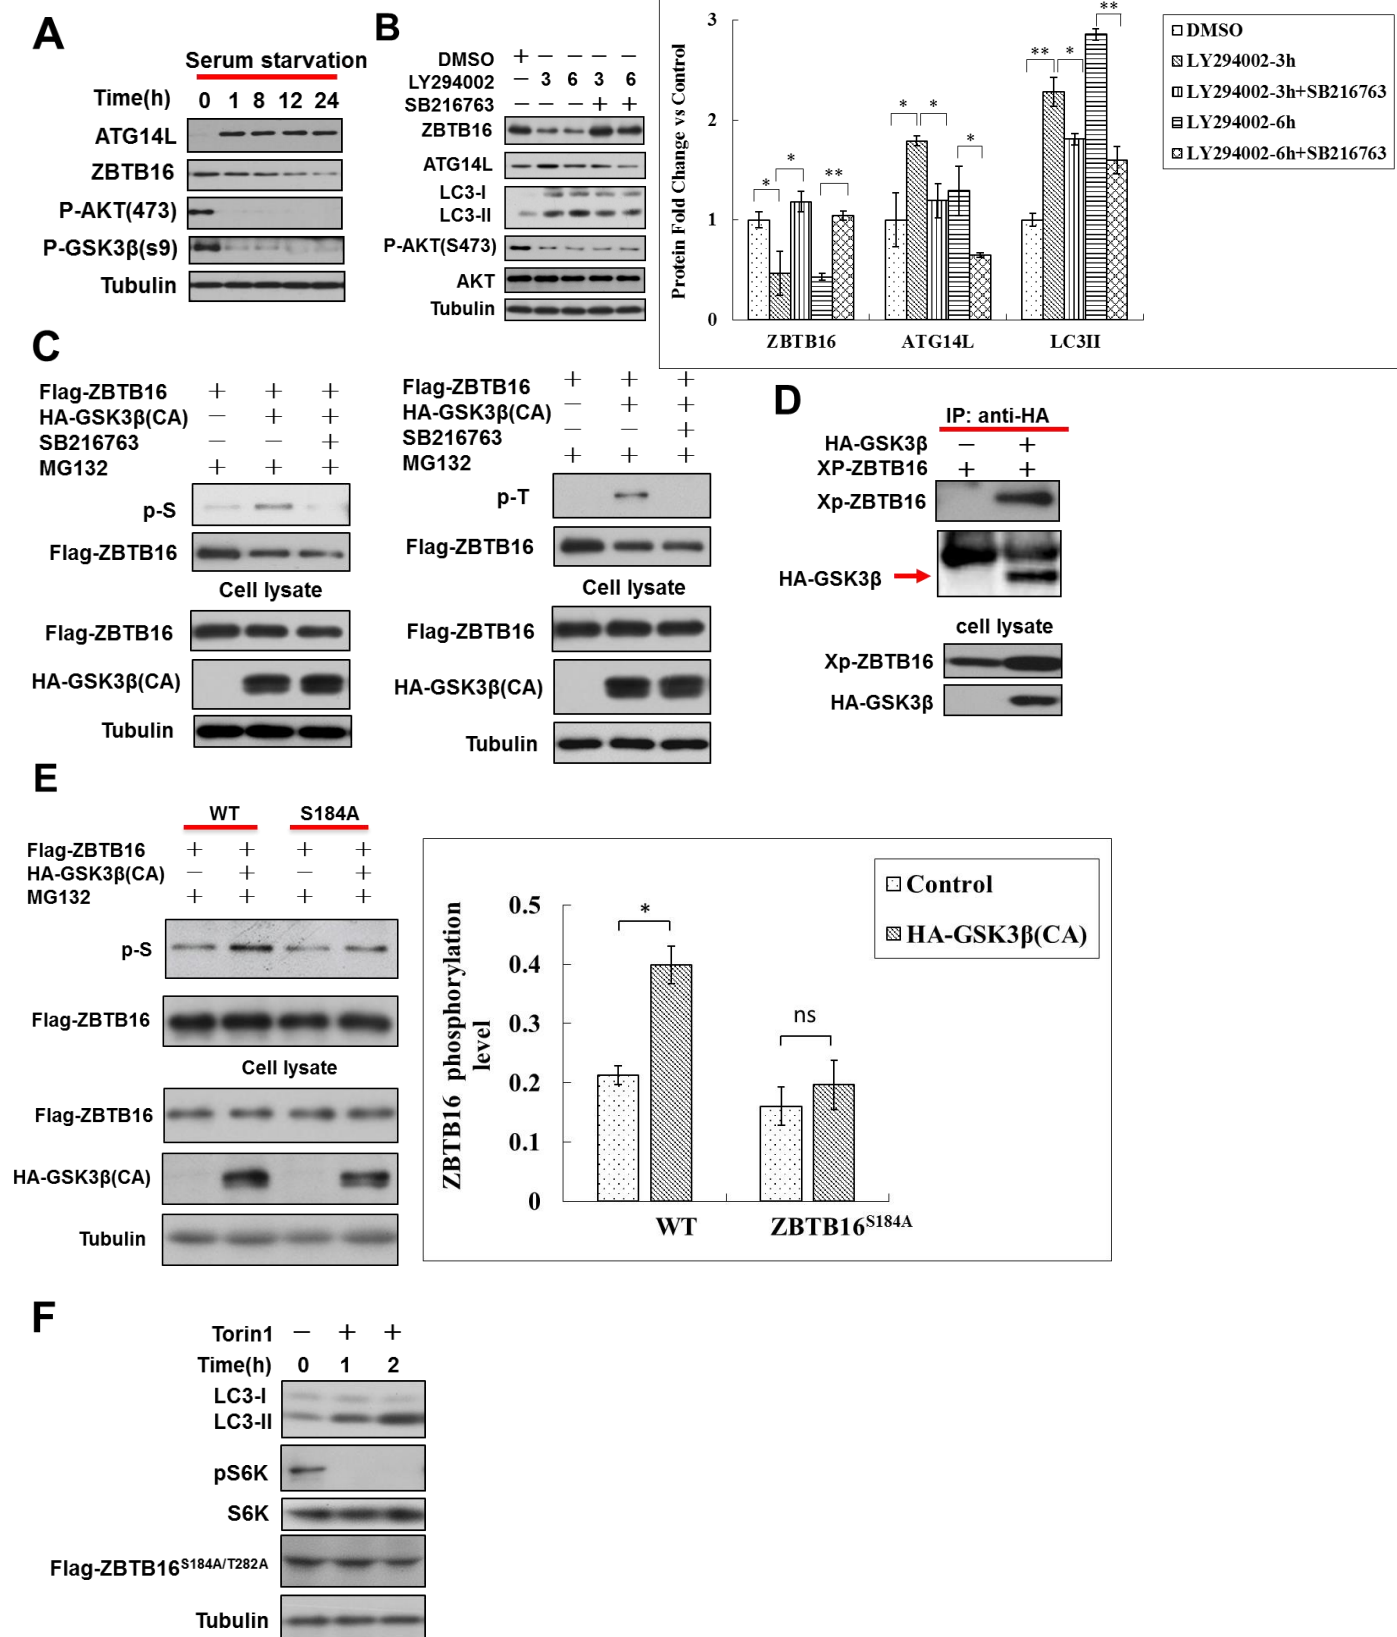

Supplement: supp [file elife-06734-supp-v1.zip]

Figure 6- figure supplement 1.

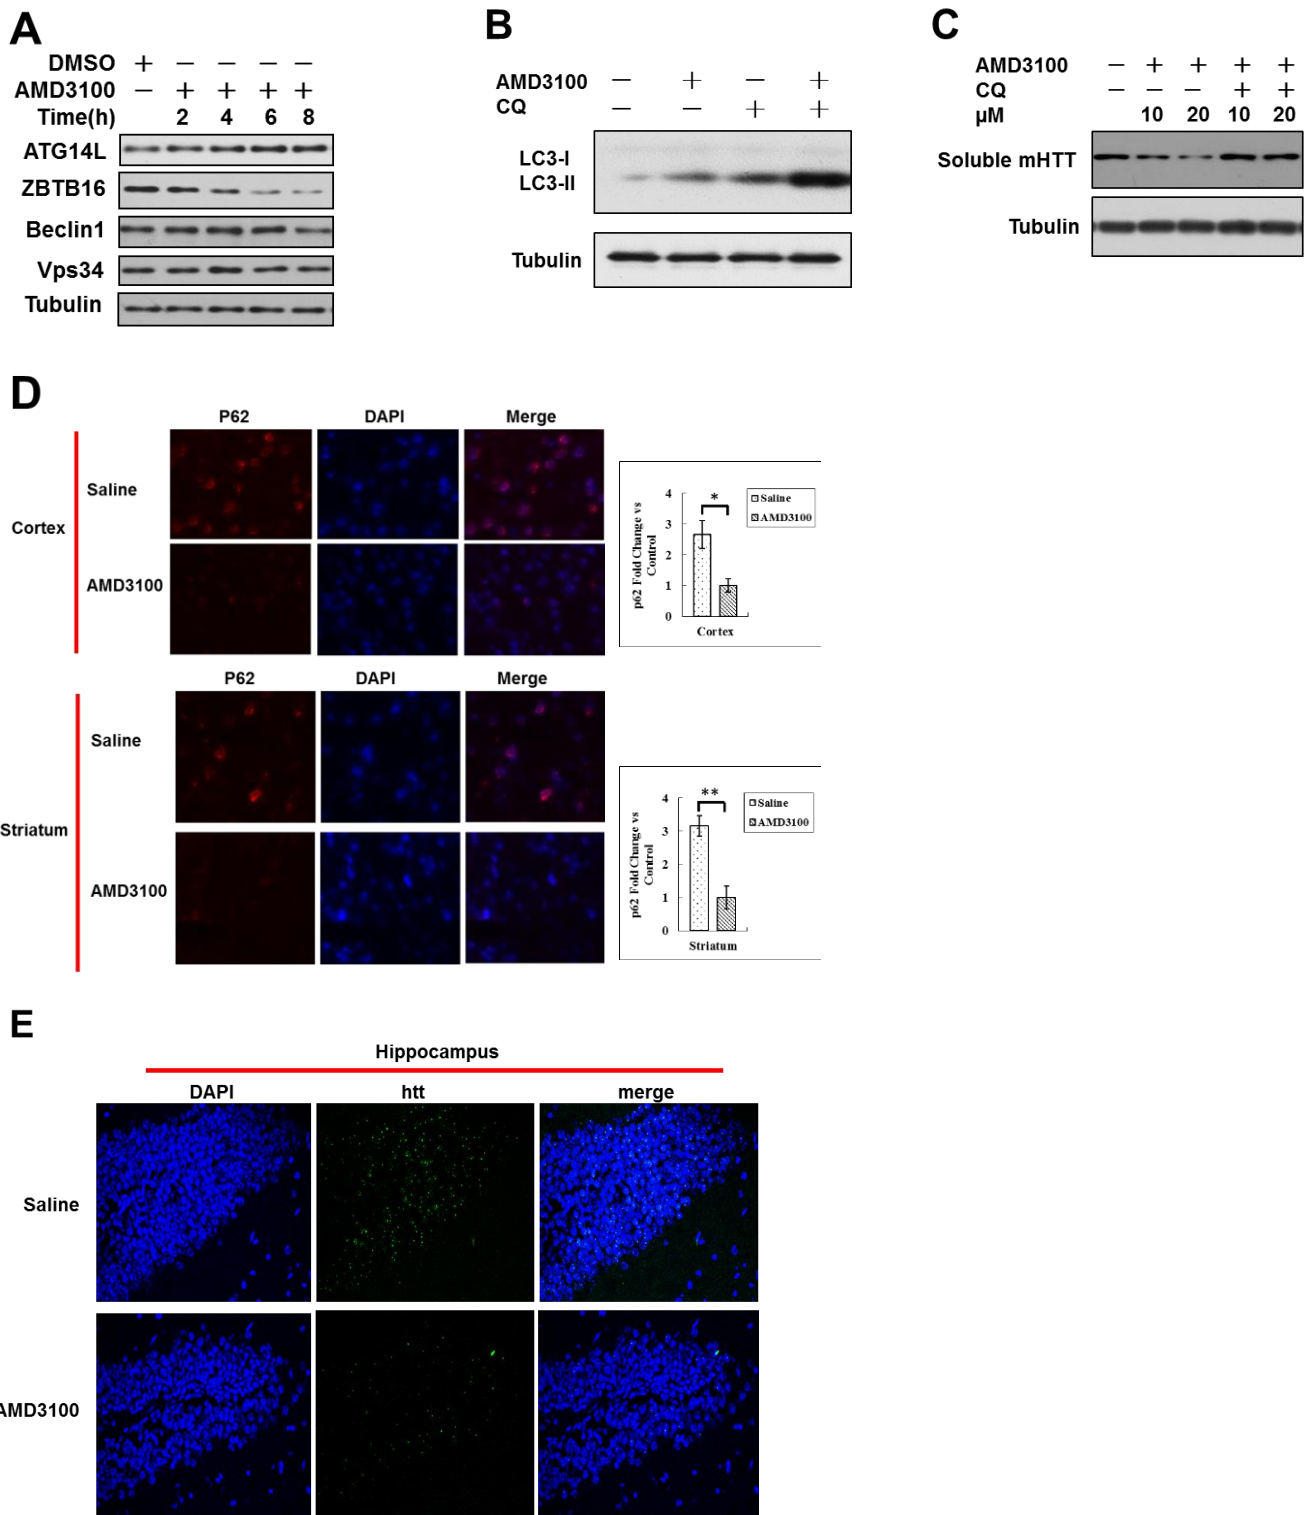

Supplement: supp [file elife-06734-supp-v1.zip]
